# Supplementary material for: Take-off mechanisms in parasitoid wasps
Source: Oxford University Press journal article supplement (doi:10.1242/jeb.161463), 2017-01-01
Supplement: jeb161463supp.pdf [file jeb161463supp.pdf]

## SUPPLEMENTARY MATERIAL

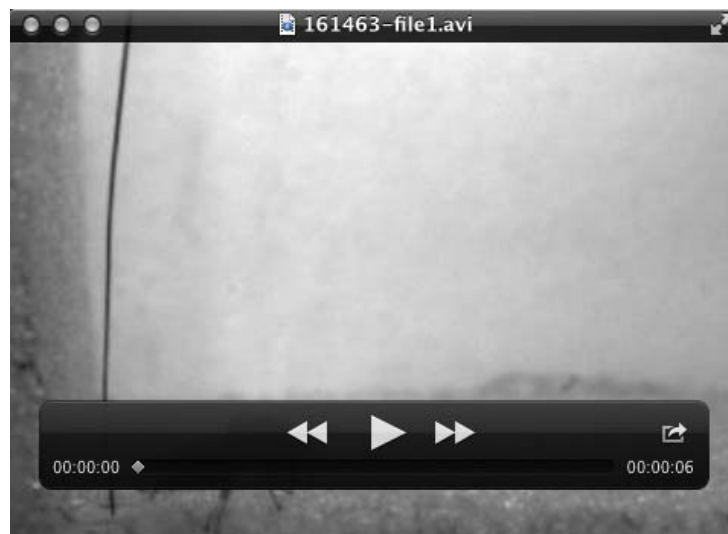

### Movie 1

Jump by *Pteromalus puparum* recorded at 5000 frames  $s^{-1}$  and replayed at 10 frames  $s^{-1}$ . See also Text Fig. 2.

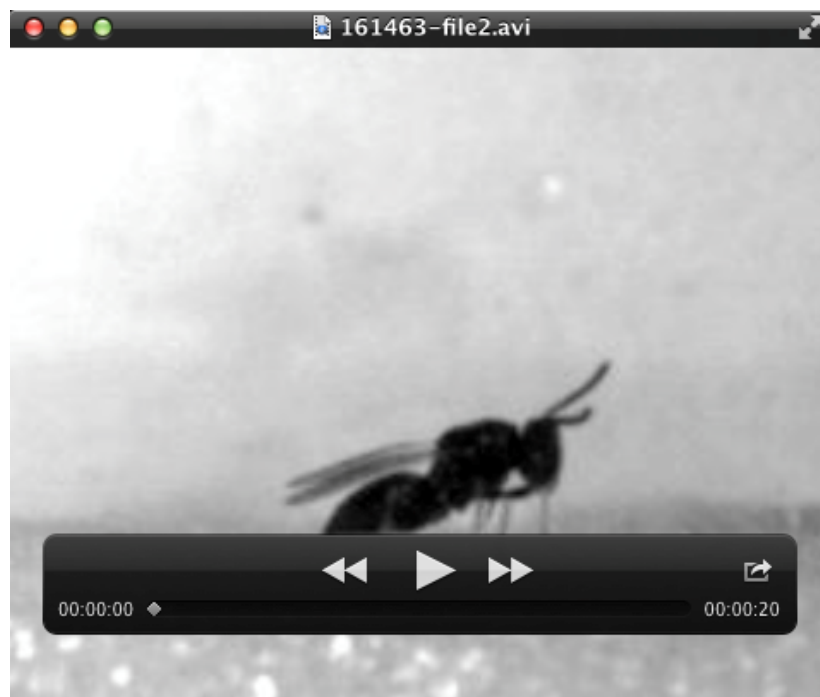

## Movie 2

Jump by *Pteromalus puparum* recorded at 5000 frames s<sup>-1</sup> and replayed at 10 frames s<sup>-1</sup>. See also Text Fig. 3.

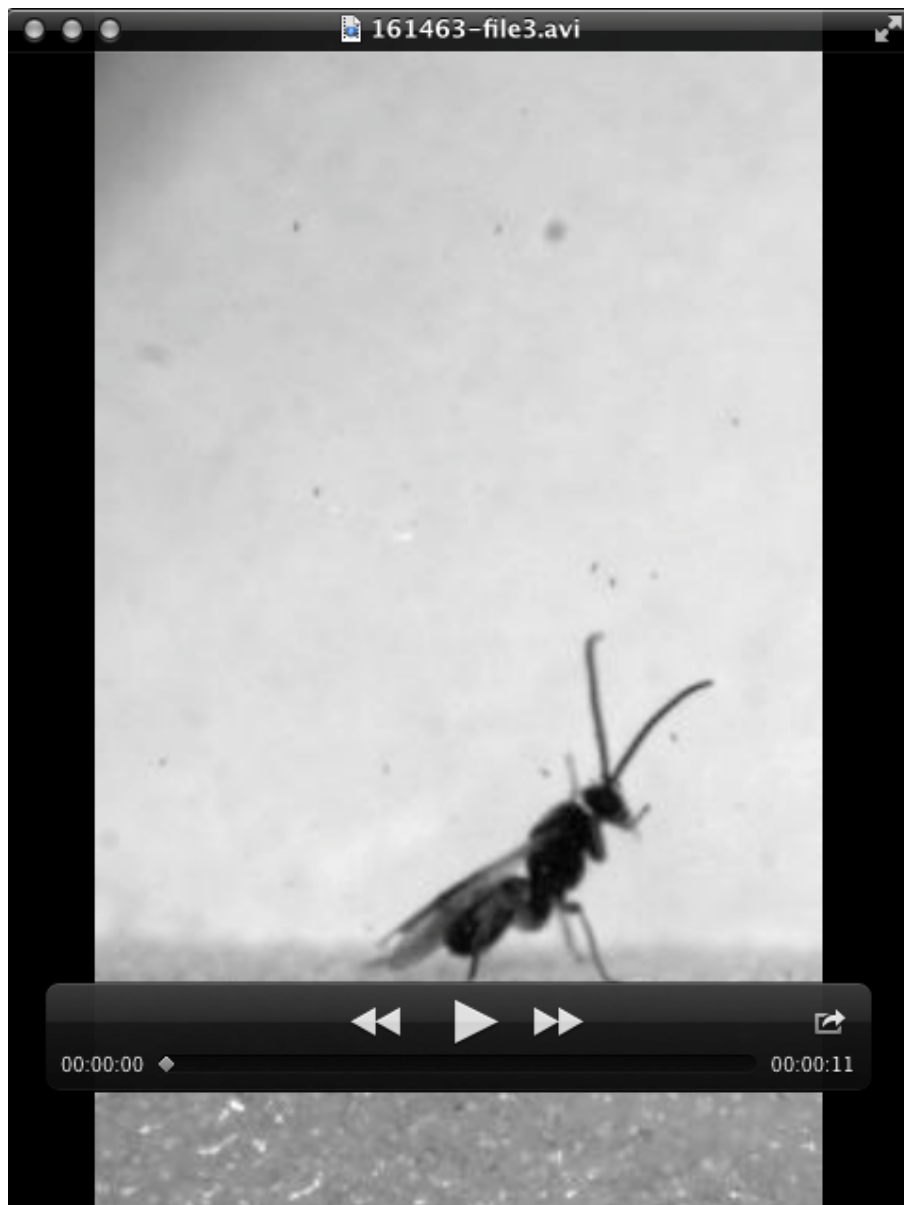

### Movie 3

Jump by *Cotesia glomerata* recorded at 1000 frames  $s^{-1}$  and replayed at 10 frames  $s^{-1}$ . See also Text Fig.4.

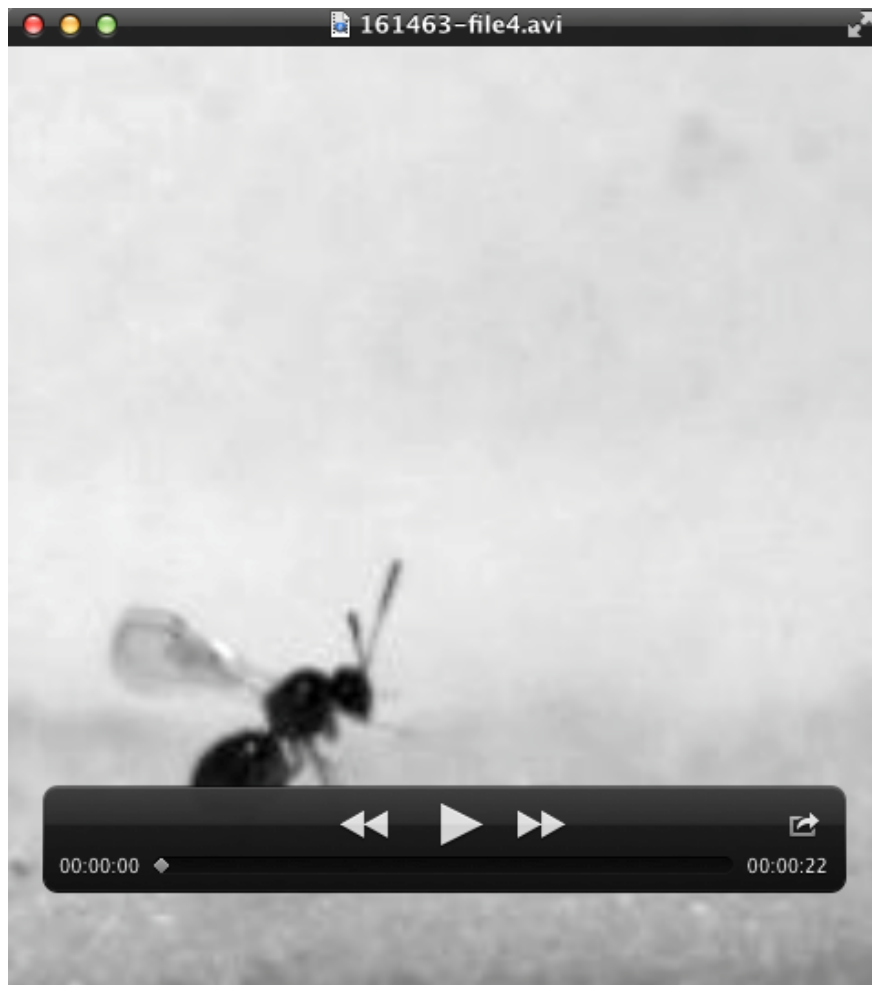

#### Movie 4

Jump by *Leptopilina boulardi* recorded at 5000 frames  $s^{-1}$  and replayed at 10 frames  $s^{-1}$ . See also Text Fig. 6.

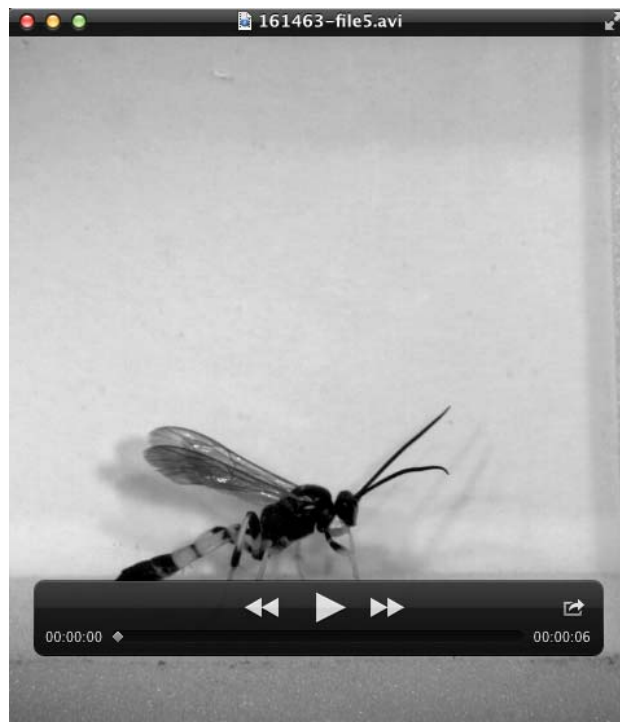

## Movie 5

Jump by *Amblyteles armatorius* recorded at 1000 frames  $s^{-1}$  and replayed at 10 frames  $s^{-1}$ . See also Text Fig. 7.
